# Supplementary material for: Puf6 primes 60S pre-ribosome nuclear export at low temperature
Source: PubMed Central journal article supplement (PMC8338941; doi:10.1038/s41467-021-24964-2), 2021-08-04
Supplement: 41467_2021_24964_MOESM3_ESM.pdf [file 41467_2021_24964_MOESM3_ESM.pdf]

### **Description of Additional Supplementary Files**

File Name: Supplementary Data 1

Description: Protein abundance values of detected proteins from SWATHMS analysis and DAVID annotation clustering analysis showing members of each of the nine-protein profile cluster and their GO term enrichment.

File Name: Supplementary Data 2

Description: Complete list of individual protein-protein crosslinks from XLMS analysis
